# Supplementary material
Source: HighWire-hosted journal article supplement (https://mentalhealth.bmj.com/content/24/2/82)
Supplement: inline-supplementary-material-1 [file inline-supplementary-material-1.pdf]

**Supplementary material for:****Common infections, mental health problems, and healthcare use in people with inflammatory bowel disease (IBD): A cohort study protocol****Authors:** Peter Irving, Kevin Barrett, Daniel Tang, Monica Nijher, Simon de Lusignan[Additional file 1](#)

Read codes used to identify inflammatory bowel disease

**Table S1.1** Read codes used to identify ulcerative colitis and Crohn's disease.

| <b>Ulcerative colitis</b> |                |                                          |
|---------------------------|----------------|------------------------------------------|
| <b>Read V2 Code</b>       | <b>Term ID</b> | <b>Description</b>                       |
| J41..                     | All            | Ulcerative colitis and/or proctitis      |
| J410.                     | All            | Ulcerative proctocolitis                 |
| J4100                     | All            | Ulcerative ileocolitis                   |
| J4101                     | All            | Ulcerative colitis                       |
| J4102                     | All            | Ulcerative rectosigmoiditis              |
| J4103                     | All            | Ulcerative proctitis                     |
| J4104                     | All            | Exacerbation of ulcerative colitis       |
| J410z                     | All            | Ulcerative proctocolitis NOS             |
| J411.                     | All            | Ulcerative (chronic) enterocolitis       |
| J412.                     | All            | Ulcerative (chronic) ileocolitis         |
| J413.                     | All            | Ulcerative pancolitis                    |
| N0454                     | All            | Juvenile arthritis in ulcerative colitis |
| N0310                     | All            | Arthropathy in ulcerative colitis        |
| <b>Read CTV3 Code</b>     | <b>Term ID</b> | <b>Description</b>                       |
| XE0ag                     | All            | Ulcerative colitis                       |
| XaZ2j                     | All            | Left sided ulcerative colitis            |
| XaYzX                     | All            | Ulcerative pancolitis                    |
| XaK6E                     | All            | Exacerbation of ulcerative colitis       |
| J410.                     | All            | Ulcerative proctocolitis                 |
| J4100                     | All            | Ulcerative ileocolitis                   |
| J410z                     | All            | Ulcerative proctocolitis NOS             |
| Jyu41                     | All            | [X]Other ulcerative colitis              |
| <b>Crohn's disease</b>    |                |                                          |
| <b>Read V2 Code</b>       | <b>Term ID</b> | <b>Description</b>                       |
| J40..                     | All            | Regional enteritis- Crohn's disease      |
| J400.                     | All            | Regional enteritis of the small bowel    |
| J4002                     | All            | Crohn's disease of the terminal ileum    |
| J4003                     | All            | Crohn's disease of the ileum unspecified |

|                       |                |                                                    |
|-----------------------|----------------|----------------------------------------------------|
| J4004                 | All            | Crohn's disease of the ileum NOS                   |
| J4005                 | All            | Exacerbation of Crohn's disease of small intestine |
| J400z                 | All            | Crohn's disease of the small bowel NOS             |
| J40..                 | All            | Crohn's disease                                    |
| J4012                 | All            | Exacerbation of Crohn's disease of large intestine |
| J401z                 | All            | Crohn's disease of the large bowel NOS             |
| J402.                 | All            | Regional ileocolitis                               |
| J40z.                 | All            | Crohn's disease NOS                                |
| <b>Read CTV3 Code</b> | <b>Term ID</b> | <b>Description</b>                                 |
| XE2QL                 | All            | Crohn's disease                                    |
| Xa0lh                 | All            | Regional enteritis                                 |
| X302r                 | All            | Crohn's jejunitis                                  |
| X302t                 | All            | Crohn's ileitis                                    |
| J4003                 | All            | Crohn's disease of the ileum unspecified           |
| J4004                 | All            | Crohn's disease of the ileum NOS                   |
| J4002                 | All            | Crohn's disease of terminal ileum                  |
| J400.                 | All            | Regional enteritis of small bowel                  |
| XaK6C                 | All            | Exacerbation of Crohn's disease of small intestine |
| J400z                 | All            | Crohn's disease of the small bowel NOS             |
| J401.                 | All            | Regional enteritis of the large bowel              |
| XE0af                 | All            | Crohn's disease of the large bowel NOS             |
| XaK6D                 | All            | Exacerbation of Crohn's disease of large intestine |
| J40z.                 | All            | Regional enteritis NOS                             |
| J4010                 | All            | Crohn's colitis                                    |
| J4011                 | All            | Crohn's proctitis                                  |
| X3050                 | All            | Perianal Crohn's disease                           |
| Jyu40                 | All            | [X]Other Crohn's disease                           |
